# Supplementary material for: Characterization of Mixed-Species Biofilms Formed by Four Gut Microbiota
Source: MDPI journal article supplement (doi:10.3390/microorganisms10122332), 2022-11-25
Supplement: s1 [file s1]

# Characterization of Mixed-Species Biofilms Formed by Four Gut Microbiota

Tao Xu <sup>1,2</sup>, Yue Xiao <sup>1,2</sup>, Hongchao Wang <sup>1,2</sup>, Jinlin Zhu <sup>1,2</sup>, Yuankun Lee <sup>3,4</sup>, Jianxin Zhao <sup>1,2,5</sup>, Wenwei Lu <sup>1,2,4,5,6,\*</sup> and Hao Zhang <sup>1,2,5,6</sup>

- <sup>1</sup> State Key Laboratory of Food Science and Technology, Jiangnan University, Wuxi 214122, China  
<sup>2</sup> School of Food Science and Technology, Jiangnan University, Wuxi 214122, China  
<sup>3</sup> Department of Microbiology & Immunology, Yong Loo Lin School of Medicine, National University of Singapore, Singapore 117545, Singapore  
<sup>4</sup> International Joint Research Laboratory for Pharmabiotics & Antibiotic Resistance, Jiangnan University, Wuxi 214122, China  
<sup>5</sup> (Yangzhou) Institute of Food Biotechnology, Jiangnan University, Yangzhou 225004, China  
<sup>6</sup> National Engineering Research Center for Functional Food, Jiangnan University, Wuxi 214122, China  
\* Correspondence: luwenwei@jiangnan.edu.cn; Tel.: +86-510-85912155

**Table S1.** Details of different strains used in this study.

| Species                                       | Number     | label |
|-----------------------------------------------|------------|-------|
| <i>Bifidobacterium longum subsp. Infantis</i> | FJND16M4   | A     |
| <i>Bifidobacterium longum subsp. Infantis</i> | FBJCP1M11  | B     |
| <i>Enterococcus faecalis</i>                  | E1         | C     |
| <i>Enterococcus faecalis</i>                  | JNGMMB7    | D     |
| <i>Bacteroides ovatus</i>                     | FTJS5K9    | E     |
| <i>Bacteroides ovatus</i>                     | FNXYCHL6K1 | F     |
| <i>Lactobacillus gasseri</i>                  | FHNFQ11L7  | G     |
| <i>Lactobacillus gasseri</i>                  | FHNFQ14L5  | H     |

**Table S2.** Details of medium (1L) used in this study.

| Formulation                            | Content |    |
|----------------------------------------|---------|----|
| Casein peptone                         | 10.00   | g  |
| tryptone                               | 10.00   | g  |
| Yeast extract                          | 2.50    | g  |
| Sodium acetate                         | 5.00    | g  |
| Lactose × H <sub>2</sub> O             | 5.00    | g  |
| Glucose                                | 5.00    | g  |
| MgSO <sub>4</sub> × 7 H <sub>2</sub> O | 45.00   | mg |
| CaCl <sub>2</sub> × 2 H <sub>2</sub> O | 90.00   | mg |
| K <sub>2</sub> HPO <sub>4</sub>        | 0.45    | g  |
| KH <sub>2</sub> PO <sub>4</sub>        | 0.45    | g  |
| NaCl                                   | 0.90    | g  |
| Resazurin                              | 1.00    | mg |
| Distilled water                        | 1000.00 | mL |
| NaHCO <sub>3</sub>                     | 4.00    | g  |
| L-Cysteine-HCl                         | 1.00    | g  |
| Hemin                                  | 10.00   | mg |

|                                                 |           |    |
|-------------------------------------------------|-----------|----|
| Cellobiose                                      | 2.00      | g  |
| (NH <sub>4</sub> ) <sub>2</sub> SO <sub>4</sub> | 0.90      | g  |
| Biotin                                          | 0.01      | mg |
| Vitamin B <sub>12</sub>                         | 0.10      | mg |
| p-Aminobenzoic acid                             | 5.00      | mg |
| Folic acid                                      | 2.00      | mg |
| Pyridoxine-HCl                                  | 10.00     | mg |
| Vitamin B <sub>1</sub>                          | 0.05      | mg |
| Riboflavin                                      | 0.05      | mg |
| D-Ca-pantothenate                               | 5.00      | mg |
| Lipoic acid                                     | 5.00      | mg |
| Nicotinic acid                                  | 2.00      | mg |
| Acetic acid                                     | 1.50      | mL |
| Propionic acid                                  | 0.70      | mL |
| Iso-Butyric acid                                | 90.00     | μL |
| n-Valeric acid                                  | 100       | μL |
| Iso-Valeric acid                                | 100.00    | μL |
| Clarified rumen fluid                           | 10        | mL |
| PH                                              | 6.2 – 6.4 |    |

**Table S3.** Primer sequences used in qPCR for species.

| Species                                              | Primer name                                    | Sequence (5'-3')                                            | Amplicon size (bp) | Reference |
|------------------------------------------------------|------------------------------------------------|-------------------------------------------------------------|--------------------|-----------|
| <i>Bifidobacterium longum</i> subsp. <i>Infantis</i> | <i>B. longum</i> _F<br><i>B. longum</i> _R     | ATCCGTCCGACCCAGACC<br>CTCGACATCCTCACGGCC                    | 123                | [1]       |
| <i>Enterococcus faecalis</i>                         | <i>E. faecalis</i> _F<br><i>E. faecalis</i> _R | CGCTTCTTTTCCTCCCGAGT<br>GCCATGCGGCATAAACTG                  | 143                | [2]       |
| <i>Bacteroides ovatus</i>                            | <i>B. ovatus</i> _F<br><i>B. ovatus</i> _R     | AAGACAACGATGGATAGGG<br>GTT<br>TTCACGCTACTTGGCTGGT           | 136                | [3]       |
| <i>Lactobacillus gasseri</i>                         | <i>L. gasseri</i> _F<br><i>L. gasseri</i> _R   | AGCGAGCTTGCTAGATGAA<br>TTTG<br>TCTTTTAAACTCTAGACATGC<br>GTC | 171                | [4]       |

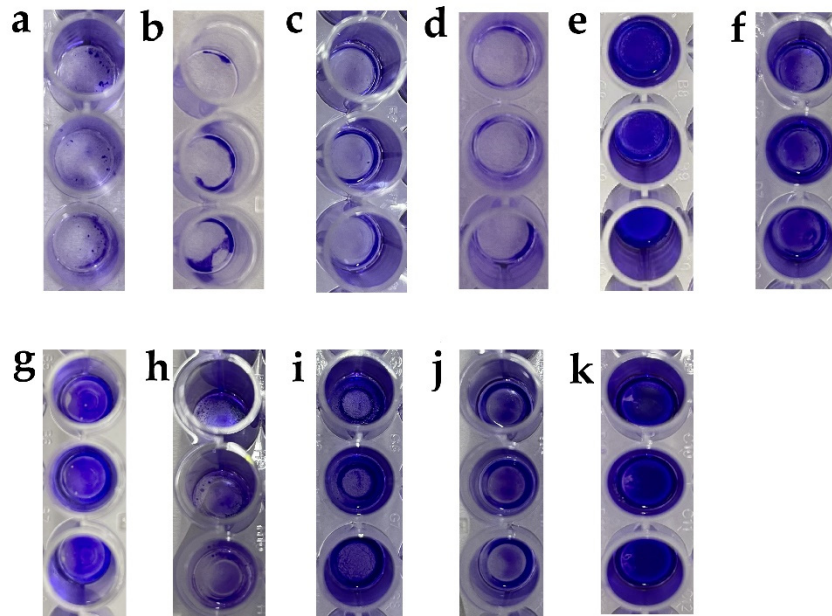

**Figure S1.** Images of the crystal violet staining of different combinations. (a) *B. longum*; (b) *E. faecalis*; (c) *B. ovatus*; (d) *L. gasseri*; (e) *B. longum* + *E. faecalis*; (f) *B. longum* + *B. ovatus*; (g) *B. longum* + *L. gasseri*; (h) *E. faecalis* + *B. ovatus*; (i) *E. faecalis* + *L. gasseri*; (j) *B. ovatus* + *L. gasseri*; (k) *B. longum* + *E. faecalis* + *B. ovatus* + *L. gasseri*.

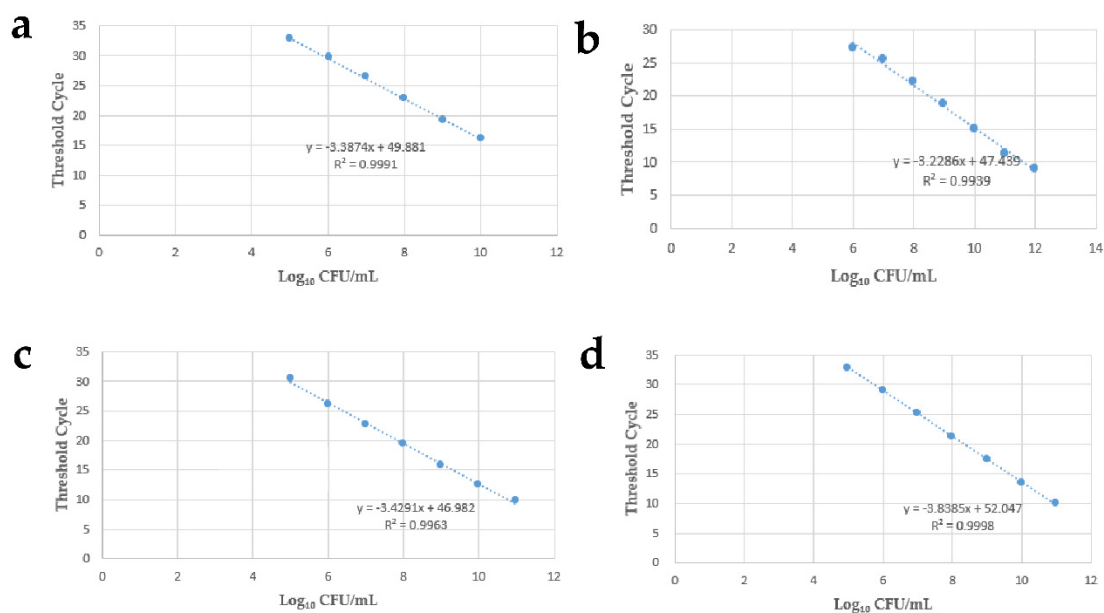

**Figure S2.** Standard curves of qPCR. (a) *B. longum*. (b) *E. faecalis*. (c) *B. ovatus*. (d) *L. gasseri*.

## Reference

[1] Sheu, S.-J.; Hwang, W.-Z.; Chiang, Y.-C.; Lin, W.-H.; Chen, H.-C.; Tsen, H.-Y. Use of Tuf Gene-Based Primers for the PCR Detection of Probiotic Bifidobacterium Species and Enumeration of Bifidobacteria in Fermented Milk by Cultural and Quantitative Real-Time PCR Methods. *J. Food Sci.* **2010**, *75*, M521–M527, <https://doi.org/10.1111/j.1750-3841.2010.01816.x>.

- [2] Heidar, S.A.-H.A.; Saber, S.E.; Eissa, S.A.-L.A.-A.; El-Ashry, S.H. Antibacterial potential of nano-particulate intracanal med-ications on a mature *E. faecalis* biofilm in an ex-vivo model. *Giornale Italiano di Endodonzia*. **2020**, *34*, 100-109. <https://doi.org/10.32067/GIE.2020.34.02.04>.
- [3] Gu, X.; Yu, T.; Guo, T.; Kong, J. A qPCR-based method for rapid quantification of six intestinal homeostasis-relevant bacterial genera in feces. *Futur. Microbiol.* **2021**, *16*, 895–906, <https://doi.org/10.2217/fmb-2020-0269>.
- [4] Kim, J.H.; Yoo, S.M.; Sohn, Y.H.; Jin, C.H.; Yang, Y.S.; Hwang, I.T.; Oh, K.Y. Predominant *Lactobacillus* species types of vaginal microbiota in pregnant Korean women: quantification of the five *Lactobacillus* species and two anaerobes. *J. Matern. Neonatal Med.* **2016**, *30*, 2329–2333, <https://doi.org/10.1080/14767058.2016.1247799>.
